# Supplementary material for: Assessing the Risk Associated with Increasing Bromide in Drinking Water Sources in the Monongahela River, Pennsylvania
Source: Atypon-hosted journal article supplement (doi:10.1061/(asce)ee.1943-7870.0001175), 2016-10-31

**ASCE Journal of Environmental Engineering**

**Assessing the Risk Associated with Increasing Bromide in Drinking Water Sources in the Monongahela River in Pennsylvania**

Yuxin Wang, Mitchell J. Small, and Jeanne M. VanBriesen,

**DOI:** 10.1061/(ASCE)EE.1943-7870.0001175

**Supplemental Data**

Table S1. Interspecies Correlation Coefficients Determined for Field Sampling THMs and Monte Carlo Simulated THMs

| When Bromide Ranges 10-20 µg/L |            |        |       |           |                            |            |        |       |           |
|--------------------------------|------------|--------|-------|-----------|----------------------------|------------|--------|-------|-----------|
| Field Sampling THMs            |            |        |       |           | Monte Carlo simulated THMs |            |        |       |           |
|                                | Chloroform | BDCM   | DBCM  | Bromoform |                            | Chloroform | BDCM   | DBCM  | Bromoform |
| Chloroform                     | 1          |        |       |           | Chloroform                 | 1          |        |       |           |
| BDCM                           | 0.461      | 1      |       |           | BDCM                       | 0.450      | 1      |       |           |
| DBCM                           | 0.191      | 0.283  | 1     |           | DBCM                       | 0.175      | 0.281  | 1     |           |
| Bromoform                      | -0.362     | 0.0433 | 0.245 | 1         | Bromoform                  | -0.353     | 0.0545 | 0.247 | 1         |

  

| When Bromide Ranges 20-40 µg/L |            |       |       |           |                            |            |       |       |           |
|--------------------------------|------------|-------|-------|-----------|----------------------------|------------|-------|-------|-----------|
| Field Sampling THMs            |            |       |       |           | Monte Carlo simulated THMs |            |       |       |           |
|                                | Chloroform | BDCM  | DBCM  | Bromoform |                            | Chloroform | BDCM  | DBCM  | Bromoform |
| Chloroform                     | 1          |       |       |           | Chloroform                 | 1          |       |       |           |
| BDCM                           | 0.613      | 1     |       |           | BDCM                       | 0.606      | 1     |       |           |
| DBCM                           | 0.475      | 0.501 | 1     |           | DBCM                       | 0.468      | 0.500 | 1     |           |
| Bromoform                      | 0.443      | 0.335 | 0.231 | 1         | Bromoform                  | 0.435      | 0.331 | 0.238 | 1         |

  

| When Bromide Ranges 40-60 µg/L |            |       |       |           |                            |            |       |       |           |
|--------------------------------|------------|-------|-------|-----------|----------------------------|------------|-------|-------|-----------|
| Field Sampling THMs            |            |       |       |           | Monte Carlo simulated THMs |            |       |       |           |
|                                | Chloroform | BDCM  | DBCM  | Bromoform |                            | Chloroform | BDCM  | DBCM  | Bromoform |
| Chloroform                     | 1          |       |       |           | Chloroform                 | 1          |       |       |           |
| BDCM                           | 0.613      | 1     |       |           | BDCM                       | 0.606      | 1     |       |           |
| DBCM                           | 0.475      | 0.501 | 1     |           | DBCM                       | 0.468      | 0.500 | 1     |           |
| Bromoform                      | 0.443      | 0.335 | 0.231 | 1         | Bromoform                  | 0.435      | 0.331 | 0.238 | 1         |

**SUPPLEMENTAL DATA**

|            |       |       |       |   |            |       |       |       |   |
|------------|-------|-------|-------|---|------------|-------|-------|-------|---|
| Chloroform | 1     |       |       |   | Chloroform | 1     |       |       |   |
| BDCM       | 0.934 | 1     |       |   | BDCM       | 0.934 | 1     |       |   |
| DBCM       | 0.655 | 0.711 | 1     |   | DBCM       | 0.659 | 0.715 | 1     |   |
| Bromoform  | 0.356 | 0.466 | 0.664 | 1 | Bromoform  | 0.360 | 0.470 | 0.665 | 1 |

**When Bromide Ranges 60-80 µg/L**

| Field Sampling THMs |            |       |       |           | Monte Carlo simulated THMs |            |       |       |           |
|---------------------|------------|-------|-------|-----------|----------------------------|------------|-------|-------|-----------|
|                     | Chloroform | BDCM  | DBCM  | Bromoform |                            | Chloroform | BDCM  | DBCM  | Bromoform |
| Chloroform          | 1          |       |       |           | Chloroform                 | 1          |       |       |           |
| BDCM                | 0.881      | 1     |       |           | BDCM                       | 0.883      | 1     |       |           |
| DBCM                | 0.578      | 0.717 | 1     |           | DBCM                       | 0.590      | 0.724 | 1     |           |
| Bromoform           | 0.121      | 0.342 | 0.215 | 1         | Bromoform                  | 0.129      | 0.346 | 0.221 | 1         |

**When Bromide Ranges 80-100 µg/L**

| Field Sampling THMs |            |       |       |           | Monte Carlo simulated THMs |            |       |       |           |
|---------------------|------------|-------|-------|-----------|----------------------------|------------|-------|-------|-----------|
|                     | Chloroform | BDCM  | DBCM  | Bromoform |                            | Chloroform | BDCM  | DBCM  | Bromoform |
| Chloroform          | 1          |       |       |           | Chloroform                 | 1          |       |       |           |
| BDCM                | 0.532      | 1     |       |           | BDCM                       | 0.546      | 1     |       |           |
| DBCM                | -0.0338    | 0.369 | 1     |           | DBCM                       | -0.0389    | 0.365 | 1     |           |
| Bromoform           | -0.0469    | 0.420 | 0.453 | 1         | Bromoform                  | -0.0505    | 0.415 | 0.453 | 1         |

**When Bromide Ranges 100-120 µg/L**

| Field Sampling THMs |            |       |       |           | Monte Carlo simulated THMs |            |       |       |           |
|---------------------|------------|-------|-------|-----------|----------------------------|------------|-------|-------|-----------|
|                     | Chloroform | BDCM  | DBCM  | Bromoform |                            | Chloroform | BDCM  | DBCM  | Bromoform |
| Chloroform          | 1          |       |       |           | Chloroform                 | 1          |       |       |           |
| BDCM                | 0.366      | 1     |       |           | BDCM                       | 0.364      | 1     |       |           |
| DBCM                | 0.222      | 0.341 | 1     |           | DBCM                       | 0.217      | 0.340 | 1     |           |
| Bromoform           | 0.406      | 0.238 | 0.773 | 1         | Bromoform                  | 0.399      | 0.228 | 0.774 | 1         |

**When Bromide > 120 µg/L**

| Field Sampling THMs |  |  |  |  | Monte Carlo simulated THMs |  |  |  |  |
|---------------------|--|--|--|--|----------------------------|--|--|--|--|
|---------------------|--|--|--|--|----------------------------|--|--|--|--|

**SUPPLEMENTAL DATA**

|            | Chloroform | BDCM  | DBCM  | Bromoform |            | Chloroform | BDCM  | DBCM  | Bromoform |
|------------|------------|-------|-------|-----------|------------|------------|-------|-------|-----------|
| Chloroform | 1          |       |       |           | Chloroform | 1          |       |       |           |
| BDCM       | 0.773      | 1     |       |           | BDCM       | 0.774      | 1     |       |           |
| DBCM       | 0.443      | 0.557 | 1     |           | DBCM       | 0.445      | 0.561 | 1     |           |
| Bromoform  | 0.0231     | 0.543 | 0.330 | 1         | Bromoform  | 0.0295     | 0.545 | 0.338 | 1         |

Table S2. Parameter Estimates and Estimated Mean Concentration for Each THM Species in Each of the Bromide Ranges. The Correlation Parameters  $P_{i,j}$  ( $i, j = 1, 4$ ) Are Shown in Table 1. Parameters Are Compared with Field Sampling THMs Data and Monte Carlo Simulation THMs Data

**When Bromide Ranges 10-20  $\mu\text{g/L}$**

| Field Sampling THMs                           |            |      |      |           | Monte Carlo simulated THMs    |            |      |      |           |
|-----------------------------------------------|------------|------|------|-----------|-------------------------------|------------|------|------|-----------|
|                                               | Chloroform | BDCM | DBCM | Bromoform |                               | Chloroform | BDCM | DBCM | Bromoform |
| $a_i$ ( $i = 1, 4$ )                          | 9.56       | 8.42 | 6.09 | 3.90      | $a_i$ ( $i = 1, 4$ )          | 9.56       | 8.41 | 6.09 | 3.90      |
| $b_i$ ( $i = 1, 4$ )                          | 0.904      | 1.66 | 2.60 | 1.40      | $b_i$ ( $i = 1, 4$ )          | 0.904      | 1.66 | 2.60 | 1.40      |
| $\mu_{i,k}$ ( $k = 1, 7$ ) in $\mu\text{g/L}$ | 21.4       | 17.8 | 13.0 | 0.132     | Simulated Mean by Monte Carlo | 21.4       | 17.7 | 13.0 | 0.132     |

**When Bromide Ranges 20-40  $\mu\text{g/L}$**

| Field Sampling THMs                           |            |      |      |           | Monte Carlo simulated THMs    |            |      |      |           |
|-----------------------------------------------|------------|------|------|-----------|-------------------------------|------------|------|------|-----------|
|                                               | Chloroform | BDCM | DBCM | Bromoform |                               | Chloroform | BDCM | DBCM | Bromoform |
| $a_i$ ( $i = 1, 4$ )                          | 9.77       | 8.36 | 5.79 | 4.98      | $a_i$ ( $i = 1, 4$ )          | 9.77       | 8.36 | 5.79 | 4.98      |
| $b_i$ ( $i = 1, 4$ )                          | 1.01       | 2.35 | 2.98 | 2.03      | $b_i$ ( $i = 1, 4$ )          | 1.01       | 2.35 | 2.98 | 2.03      |
| $\mu_{i,k}$ ( $k = 1, 7$ ) in $\mu\text{g/L}$ | 29.3       | 67.7 | 29.3 | 1.15      | Simulated Mean by Monte Carlo | 29.3       | 67.7 | 27.8 | 1.15      |

**When Bromide Ranges 40-60  $\mu\text{g/L}$**

| Field Sampling THMs  |            |      |      |           | Monte Carlo simulated THMs |            |      |      |           |
|----------------------|------------|------|------|-----------|----------------------------|------------|------|------|-----------|
|                      | Chloroform | BDCM | DBCM | Bromoform |                            | Chloroform | BDCM | DBCM | Bromoform |
| $a_i$ ( $i = 1, 4$ ) | 9.61       | 8.96 | 7.61 | 5.62      | $a_i$ ( $i = 1, 4$ )       | 9.61       | 8.96 | 7.61 | 5.62      |

**SUPPLEMENTAL DATA**

|                                          |      |      |      |      |                               |      |      |      |      |
|------------------------------------------|------|------|------|------|-------------------------------|------|------|------|------|
| $b_i$ (i = 1,4)                          | 1.39 | 2.07 | 2.87 | 2.21 | $b_i$ (i = 1,4)               | 1.39 | 2.07 | 2.87 | 2.22 |
| $\mu_{i,k}$ (k = 1,7) in $\mu\text{g/L}$ | 39.5 | 66.4 | 125  | 3.24 | Simulated Mean by Monte Carlo | 39.6 | 65.1 | 111  | 3.15 |

**When Bromide Ranges 60-80  $\mu\text{g/L}$**

| Field Sampling THMs                      |            |       |      |           | Monte Carlo simulated THMs    |            |       |      |           |
|------------------------------------------|------------|-------|------|-----------|-------------------------------|------------|-------|------|-----------|
|                                          | Chloroform | BDCM  | DBCM | Bromoform |                               | Chloroform | BDCM  | DBCM | Bromoform |
| $a_i$ (i = 1,4)                          | 9.69       | 9.25  | 8.29 | 5.96      | $a_i$ (i = 1,4)               | 9.69       | 9.24  | 8.29 | 5.96      |
| $b_i$ (i = 1,4)                          | 0.884      | 0.943 | 1.72 | 2.10      | $b_i$ (i = 1,4)               | 0.884      | 0.943 | 1.72 | 2.10      |
| $\mu_{i,k}$ (k = 1,7) in $\mu\text{g/L}$ | 24.0       | 16.2  | 17.5 | 3.52      | Simulated Mean by Monte Carlo | 24.0       | 16.2  | 17.5 | 3.52      |

**When Bromide Ranges 80-100  $\mu\text{g/L}$**

| Field Sampling THMs                      |            |       |      |           | Monte Carlo simulated THMs    |            |       |      |           |
|------------------------------------------|------------|-------|------|-----------|-------------------------------|------------|-------|------|-----------|
|                                          | Chloroform | BDCM  | DBCM | Bromoform |                               | Chloroform | BDCM  | DBCM | Bromoform |
| $a_i$ (i = 1,4)                          | 9.71       | 9.31  | 8.60 | 7.27      | $a_i$ (i = 1,4)               | 9.71       | 9.31  | 8.60 | 7.27      |
| $b_i$ (i = 1,4)                          | 0.664      | 0.737 | 2.03 | 1.81      | $b_i$ (i = 1,4)               | 0.664      | 0.737 | 2.03 | 1.81      |
| $\mu_{i,k}$ (k = 1,7) in $\mu\text{g/L}$ | 20.6       | 14.5  | 42.4 | 7.36      | Simulated Mean by Monte Carlo | 20.6       | 14.5  | 42.4 | 7.36      |

**When Bromide Ranges 100-120  $\mu\text{g/L}$**

| Field Sampling THMs                      |            |      |      |           | Monte Carlo simulated THMs    |            |      |      |           |
|------------------------------------------|------------|------|------|-----------|-------------------------------|------------|------|------|-----------|
|                                          | Chloroform | BDCM | DBCM | Bromoform |                               | Chloroform | BDCM | DBCM | Bromoform |
| $a_i$ (i = 1,4)                          | 9.42       | 8.70 | 8.51 | 6.91      | $a_i$ (i = 1,4)               | 9.42       | 8.70 | 8.51 | 6.91      |
| $b_i$ (i = 1,4)                          | 1.35       | 2.50 | 2.27 | 2.00      | $b_i$ (i = 1,4)               | 1.35       | 2.50 | 2.27 | 2.00      |
| $\mu_{i,k}$ (k = 1,7) in $\mu\text{g/L}$ | 30.7       | 136  | 65.7 | 7.48      | Simulated Mean by Monte Carlo | 30.6       | 128  | 66.0 | 7.52      |

**When Bromide > 120  $\mu\text{g/L}$**

| Field Sampling THMs |            |      |      |           | Monte Carlo simulated THMs |            |      |      |           |
|---------------------|------------|------|------|-----------|----------------------------|------------|------|------|-----------|
|                     | Chloroform | BDCM | DBCM | Bromoform |                            | Chloroform | BDCM | DBCM | Bromoform |
| $a_i$ (i = 1,4)     | 9.70       | 9.67 | 9.00 | 7.53      | $a_i$ (i = 1,4)            | 9.70       | 9.67 | 9.00 | 7.53      |

**SUPPLEMENTAL DATA**

|                                          |      |       |      |      |                               |      |       |      |      |
|------------------------------------------|------|-------|------|------|-------------------------------|------|-------|------|------|
| $b_i (i = 1,4)$                          | 1.00 | 0.935 | 2.22 | 2.10 | $b_i (i = 1,4)$               | 1.00 | 0.935 | 2.22 | 2.10 |
| $\mu_{i,k} (k = 1,7)$ in $\mu\text{g/L}$ | 26.8 | 24.5  | 95.6 | 16.8 | Simulated Mean by Monte Carlo | 26.8 | 24.5  | 92.8 | 16.8 |

Table S3. Statistical Summary (Median, Minimum and Maximum Values) of Quarterly Bromide and DBP Concentrations at 6 Drinking Water Plants. Minimum and Maximum Values Are Shown in the Parentheses.

|        | Quarters | Bromide ( $\mu\text{g/L}$ ) | Chloroform ( $\mu\text{g/L}$ ) | BDCM ( $\mu\text{g/L}$ ) | DBCM ( $\mu\text{g/L}$ ) | Bromoform ( $\mu\text{g/L}$ ) | TTHM ( $\mu\text{g/L}$ ) | HAA <sub>5</sub> ( $\mu\text{g/L}$ ) | HAA <sub>9</sub> ( $\mu\text{g/L}$ ) |
|--------|----------|-----------------------------|--------------------------------|--------------------------|--------------------------|-------------------------------|--------------------------|--------------------------------------|--------------------------------------|
| Site A | Q4, 2010 | 51<br>(12, 99)              | 9.15<br>(0.943, 10.5)          | 4.12<br>(1.09, 11.3)     | 5.94<br>(2.54, 12.2)     | 1.76<br>(1.19, 2.05)          | 22.6<br>(7.16, 33.8)     | 4.94<br>(1.72, 21.5)                 | 14.4<br>(3.85, 40)                   |
|        | Q1, 2011 | ND <sup>1</sup>             | 5.61<br>(3.46, 7.77)           | 2.47<br>(2.28, 2.67)     | 1.6<br>(0.948, 2.45)     | 0.921<br>(0.921, 0.921)       | 10.1<br>(8.36, 11.9)     | 2.36<br>(1.98, 4.67)                 | 5.76<br>(3.53, 13)                   |
|        | Q2, 2011 | ND                          | 13.9<br>(4.03, 15.4)           | 6.13<br>(3.55, 8.92)     | 2.14<br>(2.04, 2.23)     | 1.13<br>(0.099, 1.24)         | 22.6<br>(9.82, 23.8)     | 11.4<br>(5.52, 27.2)                 | 21.6<br>(7.6, 30.9)                  |

**SUPPLEMENTAL DATA**

|        |          |                     |                      |                       |                      |                        |                      |                      |                     |
|--------|----------|---------------------|----------------------|-----------------------|----------------------|------------------------|----------------------|----------------------|---------------------|
|        | Q3, 2011 | 15<br>(ND, 66)      | 15.8<br>(6.27, 18.4) | 9.60<br>(3.19, 11.3)  | 2.24<br>(1.75, 3.09) | 1.31<br>(0.80, 1.40)   | 31.0<br>(12.5, 31.2) | 11.1<br>(6.88, 13.8) | 19.2<br>(16.6, 28)  |
|        | Q4, 2011 | 12<br>(ND, 104)     | 7.82<br>(6.85, 11.3) | 30.6<br>(20.6, 40.7)  | 2.25<br>(2.25, 2.25) | 0.810<br>(0.06, 1.22)  | 32.8<br>(11.3, 47.6) | NA <sup>2</sup>      | NA                  |
|        | Q1, 2012 | ND                  | 8.80<br>(7.70, 9.82) | 6.90<br>(6.90, 6.91)  | ND                   | 0.625<br>(0.170, 1.08) | 12.8<br>(8.79, 16.9) | NA                   | NA                  |
|        | Q2, 2012 | 21.7<br>(ND, 36.5)  | 14.1<br>(12.7, 15.4) | 7.38<br>(6.11, 8.65)  | ND                   | 1.20<br>(1.05, 1.35)   | 22.6<br>(20.1, 25.1) | NA                   | NA                  |
|        | Q3, 2012 | ND                  | 15.9<br>(11.3, 20.9) | 18.25<br>(8.00, 53.1) | 5.76<br>(3.17, 8.35) | 1.43<br>(1.10, 2.09)   | 36.0<br>(22.3, 65.6) | NA                   | NA                  |
|        |          |                     |                      |                       |                      |                        |                      |                      |                     |
| Site B | Q4, 2009 | 10<br>(ND, 31.7)    | 21.4<br>(10.2, 25.6) | 5.29<br>(4.64, 8.3)   | 0.531<br>(ND, 2.47)  | ND                     | 27.9<br>(17.7, 32)   | NA                   | NA                  |
|        | Q1, 2010 | 28.1<br>(ND, 51.1)  | 3.71<br>(1.76, 7.78) | 0.78<br>(0.31, 1.57)  | ND                   | ND                     | 5.28<br>(2.3, 8.72)  | 4.06<br>(2.85, 9.85) | 7.93<br>(4.82,13)   |
|        | Q2, 2010 | 23.6<br>(12.5, 93)  | 13.8<br>(7, 30.2)    | 6.45<br>(0.38, 14.1)  | 1.10<br>(ND, 11.6)   | ND                     | 31.6<br>(8.48, 50.8) | 8<br>(4.74,14.3)     | 19.1<br>(13.1,30.4) |
|        | Q3, 2010 | 85.5<br>(62.1, 171) | 11.2<br>(1.22, 25.7) | 9.25<br>(2.9, 12.8)   | 9.01<br>(ND, 33.3)   | 2.38<br>(ND, 11.5)     | 32<br>(7.51, 83.4)   | 7.33<br>(3.74,21.8)  | 27.5<br>(8.97,38.5) |
|        | Q4, 2010 | 56<br>(ND, 80.4)    | 19.9<br>(3.1, 42.9)  | 9.42<br>(1.89, 21.9)  | 8.15<br>(0.99, 10.9) | 0.74<br>(ND, 2.2)      | 38.2<br>(5.97, 76.4) | 6.72<br>(4.43,19)    | 13.1<br>(7.85,28.6) |
|        | Q1, 2011 | 34<br>(ND, 54.2)    | 4.87<br>(2.25, 11.4) | 1.86<br>(1.14, 2.60)  | ND                   | ND                     | 7.95<br>(3.4, 13.9)  | 12.9<br>(3.87,20)    | 21.3<br>(14.4,30)   |
|        | Q2, 2011 | 19<br>(ND, 90)      | 17.8<br>(12.1, 28.2) | 4.57<br>(3.61, 15.4)  | 2.04<br>(1.09, 3.1)  | 0.99<br>(ND, 1.4)      | 23.3<br>(18.9, 48.0) | 9.51<br>(5.27,15.8)  | 22.6<br>(11.3,33.7) |
|        | Q3, 2011 | 55<br>(ND, 225)     | 25.9<br>(6.07, 36.3) | 10.7<br>(3.48, 20.1)  | 1.89<br>(ND, 9.7)    | 1.14<br>(0.05, 1.41)   | 39.7<br>(10.7, 58.4) | 10.6<br>(6.89, 15.6) | 25.9<br>(20.5,34.9) |
|        | Q4, 2011 | 26<br>(ND, 28)      | 9.9<br>(8.03, 13.3)  | 6.24<br>(5.83, 9.4)   | ND                   | 0.68<br>(0.06, 1.15)   | 15.8<br>(14.9, 23.8) | NA                   | NA                  |
|        |          |                     |                      |                       |                      |                        |                      |                      |                     |
| Site C | Q4, 2009 | ND                  | 62.9<br>(45.2, 80.6) | 22.8<br>(19.1, 26.5)  | 6.35<br>(1.35, 11.3) | ND                     | 92.1<br>(83.1, 101)  | NA                   | NA                  |
|        | Q1, 2010 | 30.5<br>(12.6,48)   | 12.2<br>(7.52, 34.7) | 6.5<br>(4.68, 9.3)    | 1.45<br>(0.79, 5.4)  | ND<br>(ND, 1.2)        | 21.7<br>(18.2, 45.3) | 5.66<br>(ND, 9.94)   | 15.1<br>(ND, 18.1)  |

**SUPPLEMENTAL DATA**

|          |                    |                      |                      |                      |                      |                      |                      |                      |                      |
|----------|--------------------|----------------------|----------------------|----------------------|----------------------|----------------------|----------------------|----------------------|----------------------|
|          | Q2, 2010           | 30.5<br>(ND, 274)    | 47.1<br>(20.6, 116)  | 28.4<br>(6, 44.8)    | 8.1<br>(2.2, 26.1)   | ND<br>(ND, 8.5)      | 88.1<br>(33, 174)    | 7.45<br>(5.22,13.7)  | 24.1<br>(15.9, 30.3) |
|          | Q3, 2010           | 106<br>(82.4, 234)   | 14.5<br>(4.17,42.6)  | 17.2<br>(7.91, 52.4) | 20.8<br>(9.88, 45.1) | 4.84<br>(2.33,11.2)  | 59.4<br>(27.9, 149)  | 12.5<br>(3.69,20.9)  | 33.4<br>(14.8, 45.9) |
|          | Q4, 2010           | 60<br>(ND, 100)      | 27.5<br>(7.0, 53.5)  | 28<br>(5.38, 44.9)   | 19.1<br>(2.53, 29.5) | 2.91<br>(1.55,8.7)   | 77.7<br>(16.5, 118)  | 6.09<br>(5.2, 21.5)  | 18.6<br>(15.5, 40.2) |
|          | Q1, 2011           | 53<br>(20, 67.8)     | 7.7<br>(7.13, 39.6)  | 7.3<br>(5.57, 11.8)  | 3.17<br>(2.8, 4)     | 0.12<br>(ND, 1.4)    | 20.3<br>(15.7, 54.7) | 5.27<br>(4.48,11.0)  | 14.4<br>(11.7, 23.9) |
|          | Q2, 2011           | 16.3<br>(ND, 94)     | 34.7<br>(16.9, 61)   | 9.61<br>(8.67, 31.8) | 2.99<br>(1.48, 19.1) | ND<br>(ND, 2.2)      | 46.5<br>(29.6, 95.4) | 8.78<br>(5.27,17.1)  | 20.6<br>(13.3, 42.8) |
|          |                    |                      |                      |                      |                      |                      |                      |                      |                      |
| Site D   | Q4, 2009           | 10.3<br>(ND, 17.1)   | 72.4<br>(65.3, 79.7) | 16.9<br>(16, 17.8)   | 0.656<br>(ND, 1.31)  | ND                   | 90.1<br>(84.4,95.7)  | NA                   | NA                   |
|          | Q1, 2010           | 8.7<br>(ND, 61.6)    | 18.2<br>(3.5, 45.7)  | 6.8<br>(2.29, 11)    | 1.69<br>(1.14, 2)    | ND                   | 26.2<br>(7.4, 58.7)  | 5.52<br>(4.07, 6.44) | 11.7<br>(8.13, 22.6) |
|          | Q2, 2010           | 48.8<br>(ND, 599)    | 16.5<br>(12.3, 61)   | 16.9<br>(3.76, 34.9) | 10.1<br>(ND, 15)     | ND                   | 47<br>(18.1, 108)    | 12.3<br>(7.42, 24.6) | 27.2<br>(19.3,43.7)  |
|          | Q3, 2010           | 145<br>(48, 234)     | 25<br>(3.58, 61.6)   | 26.8<br>(11, 66.4)   | 31.2<br>(ND, 34.9)   | 5.21<br>(1.1, 11.9)  | 90.8<br>(21, 189)    | 5.44<br>(3.55, 30.3) | 28.1<br>(10.3,58.8)  |
|          | Q4, 2010           | 185<br>(94, 254)     | 24<br>(8.6, 51)      | 31<br>(23.7, 57)     | 42.8<br>(29.4, 66.4) | 5.01<br>(3.79, 14)   | 97<br>(87.2, 160)    | 14<br>(5.07, 20.8)   | 25.2<br>(14.5,29.5)  |
|          | Q1, 2011           | 19<br>(ND, 191)      | 11.1<br>(6.47, 34.3) | 9.7<br>(6.11, 11.4)  | 3.39<br>(3.34, 57)   | 1.43<br>(0.1, 1.61)  | 27<br>(17.4,49.1)    | 5.78<br>(3.42, 12.8) | 9.66<br>(5.21,21.1)  |
|          | Q2, 2011           | 39<br>(ND, 70)       | 58.4<br>(37.7, 71.5) | 27<br>(11.7, 58.4)   | 2.96<br>(ND, 11.4)   | 1.39<br>(0.08, 1.65) | 99.8<br>(52.4, 131)  | 9.99<br>(3.87, 24.9) | 23.9<br>(14.4,56.3)  |
|          | Q3, 2011           | 21<br>(ND, 62)       | 48.6<br>(20.3, 103)  | 16<br>(ND, 71.2)     | ND<br>(ND, 58.4)     | 1.06<br>(ND, 1.71)   | 68.2<br>(32.3, 186)  | 11.5<br>(4.56, 32.2) | 25.4<br>(13.1,52.9)  |
|          | Q4, 2011           | 143<br>(143,143)     | 22.4<br>(22.4, 22.4) | 9.38<br>(9.38, 9.38) | 2.34<br>(2.34, 2.34) | 0.08<br>(0.08, 0.08) | 34<br>(34.2, 160)    | NA                   | NA                   |
|          | Q1, 2012           | 2.3<br>(2.3, 2.3)    | 12.4<br>(12.4, 12.4) | ND                   | ND                   | ND                   | 12.4<br>(12.4, 12.4) | NA                   | NA                   |
| Q2, 2012 | 36.5<br>(ND, 97.3) | 19.5<br>(17.2, 45.1) | 16.6<br>(9.19, 17.1) | ND<br>(ND, 5.3)      | 0.07<br>(0.06, 0.08) | 42<br>(26.5, 61.7)   | NA                   | NA                   |                      |
| Q3, 2012 | 6.5<br>(ND, 63.8)  | 47<br>(29.2, 60.2)   | 55<br>(15.8, 111)    | 8.72<br>(ND, 16.1)   | 1.42<br>(1.02, 2.86) | 112<br>(49.6, 173)   | NA                   | NA                   |                      |

**SUPPLEMENTAL DATA**

|        |          |                      |                      |                      |                      |                      |                      |                      |                      |
|--------|----------|----------------------|----------------------|----------------------|----------------------|----------------------|----------------------|----------------------|----------------------|
|        |          |                      |                      |                      |                      |                      |                      |                      |                      |
| Site E | Q2, 2010 | 25.1<br>(6.77, 61)   | 5.7<br>(2.16, 12.7)  | 0.42<br>(ND, 9.4)    | ND<br>(ND, 8.69)     | ND<br>(ND, 0.5)      | 6.8<br>(2.16, 31.2)  | 6.83<br>(3.42, 9.26) | 15.4<br>(4.87, 19.7) |
|        | Q3, 2010 | 130<br>(63, 153)     | 8.13<br>(0.15, 11.6) | 3.75<br>(1.82, 5.68) | 1.82<br>(0.62, 3.69) | ND<br>(ND, 0.91)     | 13.8<br>(4.14, 19.2) | 7.74<br>(2.74, 23)   | 15.8<br>(6.48, 26.5) |
|        | Q4, 2010 | 85.8<br>(46.6, 99)   | 11.7<br>(4.2, 17.8)  | 4.36<br>(1.28, 6.88) | 2.83<br>(0.49, 7.04) | 0.53<br>(ND, 9.42)   | 23.4<br>(5.98, 30.1) | 7.11<br>(3.31, 25.6) | 17.7<br>(5.52, 35.7) |
|        | Q1, 2011 | ND<br>(5.4, 43.8)    | 3.16<br>(0.27, 18.2) | 0.46<br>(ND, 2.46)   | ND<br>(ND, 0.85)     | ND                   | 4.46<br>(0.27, 20.7) | 7.44<br>(3.96, 10.1) | 13<br>(6.8, 13.8)    |
|        | Q2, 2011 | ND<br>(3.87, 23)     | 20.1<br>(9.78, 61)   | 3.49<br>(1.97, 8.54) | 1.31<br>(ND, 1.93)   | ND<br>(ND, 1)        | 25.4<br>(12.7, 70.6) | 6.97<br>(4.09, 20.4) | 17<br>(10.3, 37.7)   |
|        | Q3, 2012 | ND<br>(2.99, 49)     | 19.2<br>(8.49, 26.8) | 14.3<br>(9.15, 106)  | ND<br>(ND, 8.93)     | 0.65<br>(ND, 1.41)   | 39.8<br>(18.3, 128)  | NA                   | NA                   |
|        |          |                      |                      |                      |                      |                      |                      |                      |                      |
| Site F | Q2, 2010 | 36<br>(ND, 67)       | 65.7<br>(31.6, 77.7) | 32.5<br>(20.8, 34.5) | 14.7<br>(12, 19)     | 0.33<br>(ND, 6.25)   | 117<br>(64.5, 128)   | 7.4<br>(4.74, 13.3)  | 24.7<br>(18.6, 37)   |
|        | Q3, 2010 | 102<br>(33, 127)     | 26.2<br>(8.2, 51.6)  | 20.9<br>(11.6, 32.9) | 20.1<br>(ND, 30.9)   | 6.17<br>(1.84, 6.86) | 81.6<br>(25.1, 107)  | 8.17<br>(4.87, 11.9) | 14.2<br>(8.35, 33.7) |
|        | Q4, 2010 | 74.6<br>(36, 136)    | 31.1<br>(18, 34.1)   | 31.7<br>(18.5, 38.6) | 31.1<br>(21.9, 34.9) | 5.39<br>(4.5, 6.32)  | 99.7<br>(62.9, 113)  | 7.5<br>(5.18, 11)    | 18.1<br>(12.3, 24.2) |
|        | Q1, 2011 | 88.5<br>(ND, 89)     | 21.2<br>(16.9, 87.6) | 17<br>(11.9, 19)     | 5.39<br>(5.09, 6.6)  | 1.72<br>(1.37, 8.64) | 46.6<br>(35.2, 121)  | 4.78<br>(3.87, 5.43) | 14.4<br>(10.6, 20)   |
|        | Q2, 2011 | 14.1<br>(ND, 148)    | 68.6<br>(37.8, 96.6) | 24.1<br>(15.8, 32.9) | 6.88<br>(5.77, 16.9) | 0.98<br>(0.55, 5.87) | 110<br>(60.5, 127)   | 10.6<br>(3.38, 17.8) | 19.3<br>(17, 33.2)   |
|        | Q3, 2011 | 37<br>(ND, 240)      | 37.8<br>(18, 67.6)   | 18.5<br>(15.8, 20)   | 6.7<br>(5.77, 21.9)  | 1.06<br>(0.89, 4.5)  | 62.9<br>(60.5, 95.2) | 13<br>(4.66, 17.6)   | 22.6<br>(14.7, 29.5) |
|        | Q2, 2012 | 19.2<br>(19.2, 19.2) | 19.8<br>(19.8, 19.8) | 11.3<br>(11.3, 11.3) | ND                   | ND                   | 31.1<br>(31.1, 31.1) | NA                   | NA                   |
|        | Q3, 2012 | 6.64<br>(ND, 58.5)   | 31.9<br>(30.3, 92.2) | 19.6<br>(17.1, 49.4) | ND<br>(ND, 9.3)      | ND<br>(ND, 1)        | 51.5<br>(48.5, 151)  | NA                   | NA                   |

<sup>1</sup> ND indicates non-detected.

<sup>2</sup> NA indicates not applicable.



Table S4. Oral Cancer Risk Values (Mean  $\pm$  Standard Deviation) for THM Species on a Quarterly Basis at Site D. The Data in This Table Are Plotted in Figure 4

**SUPPLEMENTAL DATA**

| Quarters | Chloroform Oral Cancer Risk                   | BDCM Oral Cancer Risk                         | DBCM Oral Cancer Risk                         | Bromoform Oral Cancer Risk                    |
|----------|-----------------------------------------------|-----------------------------------------------|-----------------------------------------------|-----------------------------------------------|
| Q4, 2009 | $1.26 \times 10^{-5} \pm 1.78 \times 10^{-6}$ | $3 \times 10^{-5} \pm 2.3 \times 10^{-6}$     | $1.57 \times 10^{-6} \pm 2.23 \times 10^{-6}$ | 0                                             |
| Q1, 2010 | $3.92 \times 10^{-6} \pm 3.73 \times 10^{-6}$ | $1.19 \times 10^{-5} \pm 7.71 \times 10^{-6}$ | $3.8 \times 10^{-6} \pm 1.02 \times 10^{-6}$  | 0                                             |
| Q2, 2010 | $4.56 \times 10^{-6} \pm 3.04 \times 10^{-6}$ | $2.87 \times 10^{-5} \pm 1.76 \times 10^{-5}$ | $1.98 \times 10^{-5} \pm 1.32 \times 10^{-5}$ | $9.75 \times 10^{-8} \pm 1.62 \times 10^{-7}$ |
| Q3, 2010 | $4.01 \times 10^{-6} \pm 2.79 \times 10^{-6}$ | $5.12 \times 10^{-5} \pm 2.63 \times 10^{-5}$ | $6.59 \times 10^{-5} \pm 4 \times 10^{-5}$    | $1.35 \times 10^{-6} \pm 8.74 \times 10^{-7}$ |
| Q4, 2010 | $4.68 \times 10^{-6} \pm 3.31 \times 10^{-6}$ | $6.32 \times 10^{-5} \pm 2.64 \times 10^{-5}$ | $9.81 \times 10^{-5} \pm 1.08 \times 10^{-6}$ | $1.57 \times 10^{-6} \pm 1.08 \times 10^{-6}$ |
| Q1, 2011 | $3.01 \times 10^{-6} \pm 2.59 \times 10^{-6}$ | $1.61 \times 10^{-5} \pm 4.78 \times 10^{-6}$ | $8.98 \times 10^{-6} \pm 1.58 \times 10^{-6}$ | $2.35 \times 10^{-7} \pm 1.86 \times 10^{-7}$ |
| Q2, 2011 | $9.74 \times 10^{-6} \pm 2.98 \times 10^{-6}$ | $5.73 \times 10^{-5} \pm 4.22 \times 10^{-6}$ | $1.26 \times 10^{-5} \pm 1.61 \times 10^{-5}$ | $2.34 \times 10^{-7} \pm 1.09 \times 10^{-7}$ |
| Q3, 2011 | $9.15 \times 10^{-6} \pm 4.48 \times 10^{-6}$ | $4.2 \times 10^{-5} \pm 4.01 \times 10^{-6}$  | $1.11 \times 10^{-5} \pm 2.08 \times 10^{-5}$ | $2.29 \times 10^{-7} \pm 1.15 \times 10^{-7}$ |
| Q4, 2011 | $3.9 \times 10^{-6} \pm 0$                    | $1.66 \times 10^{-5} \pm 0$                   | $5.62 \times 10^{-6} \pm 0$                   | $1.81 \times 10^{-8} \pm 0$                   |
| Q2, 2012 | $4.75 \times 10^{-6} \pm 2.7 \times 10^{-6}$  | $2.53 \times 10^{-5} \pm 7.86 \times 10^{-6}$ | $4.21 \times 10^{-6} \pm 7.29 \times 10^{-6}$ | $1.58 \times 10^{-8} \pm 2.26 \times 10^{-9}$ |
| Q3, 2012 | $7.67 \times 10^{-6} \pm 2.1 \times 10^{-6}$  | $9.94 \times 10^{-5} \pm 5.51 \times 10^{-5}$ | $1.98 \times 10^{-5} \pm 1.9 \times 10^{-5}$  | $3.84 \times 10^{-7} \pm 1.69 \times 10^{-7}$ |

Figure S1. Quarterly bromide concentrations and individual THM species levels in finished water of Site A

**SUPPLEMENTAL DATA**

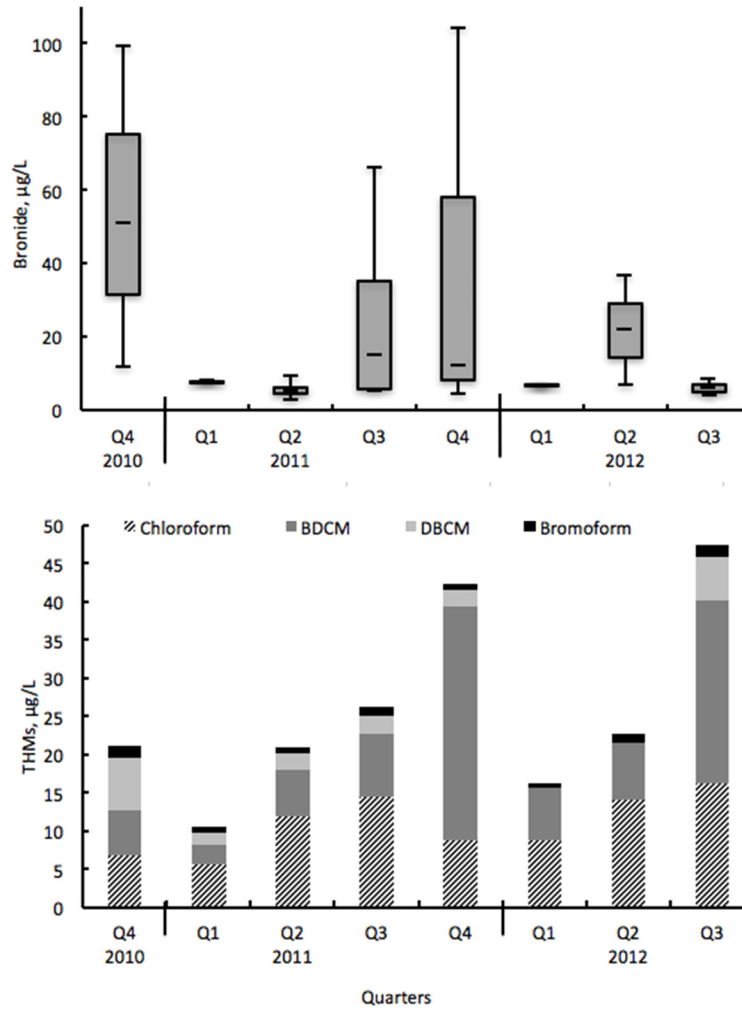

Figure S2. Quarterly bromide concentrations and individual THM species levels in finished water of Site B

**SUPPLEMENTAL DATA**

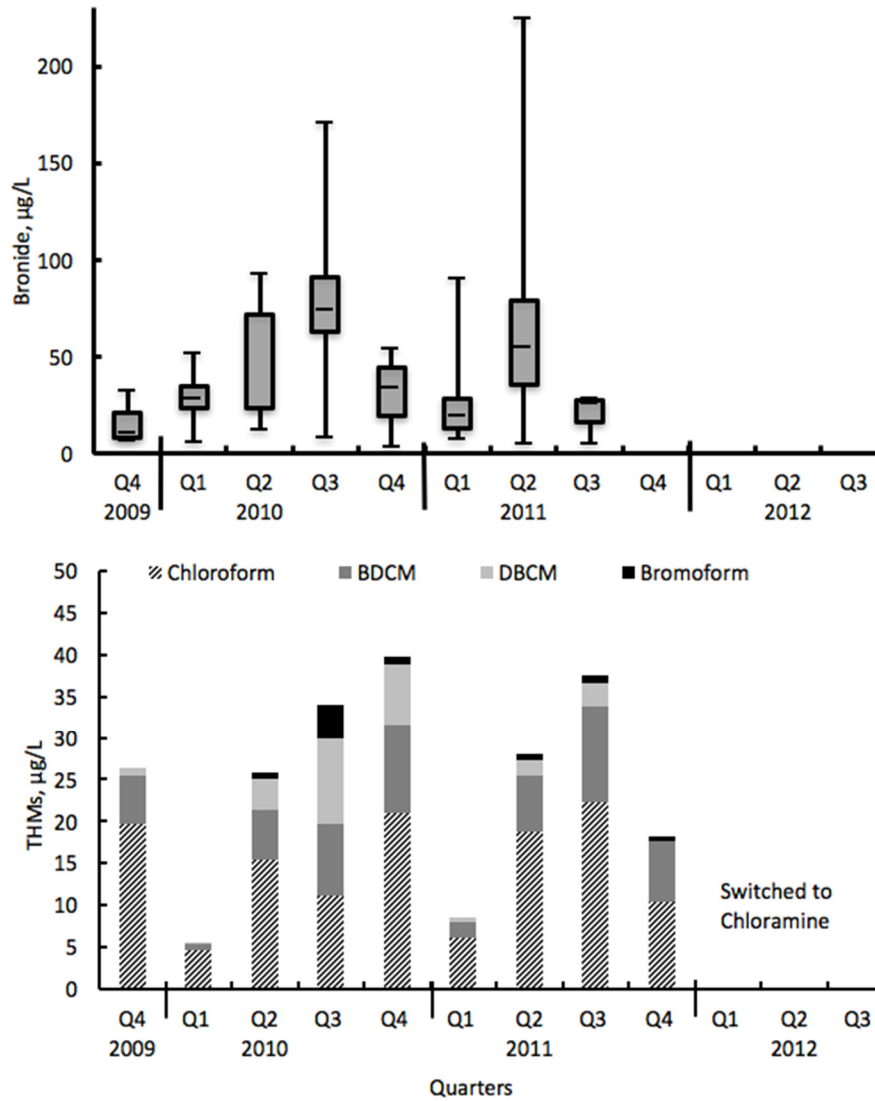

Figure S3. Quarterly bromide concentrations and individual THM species levels in finished water of Site C

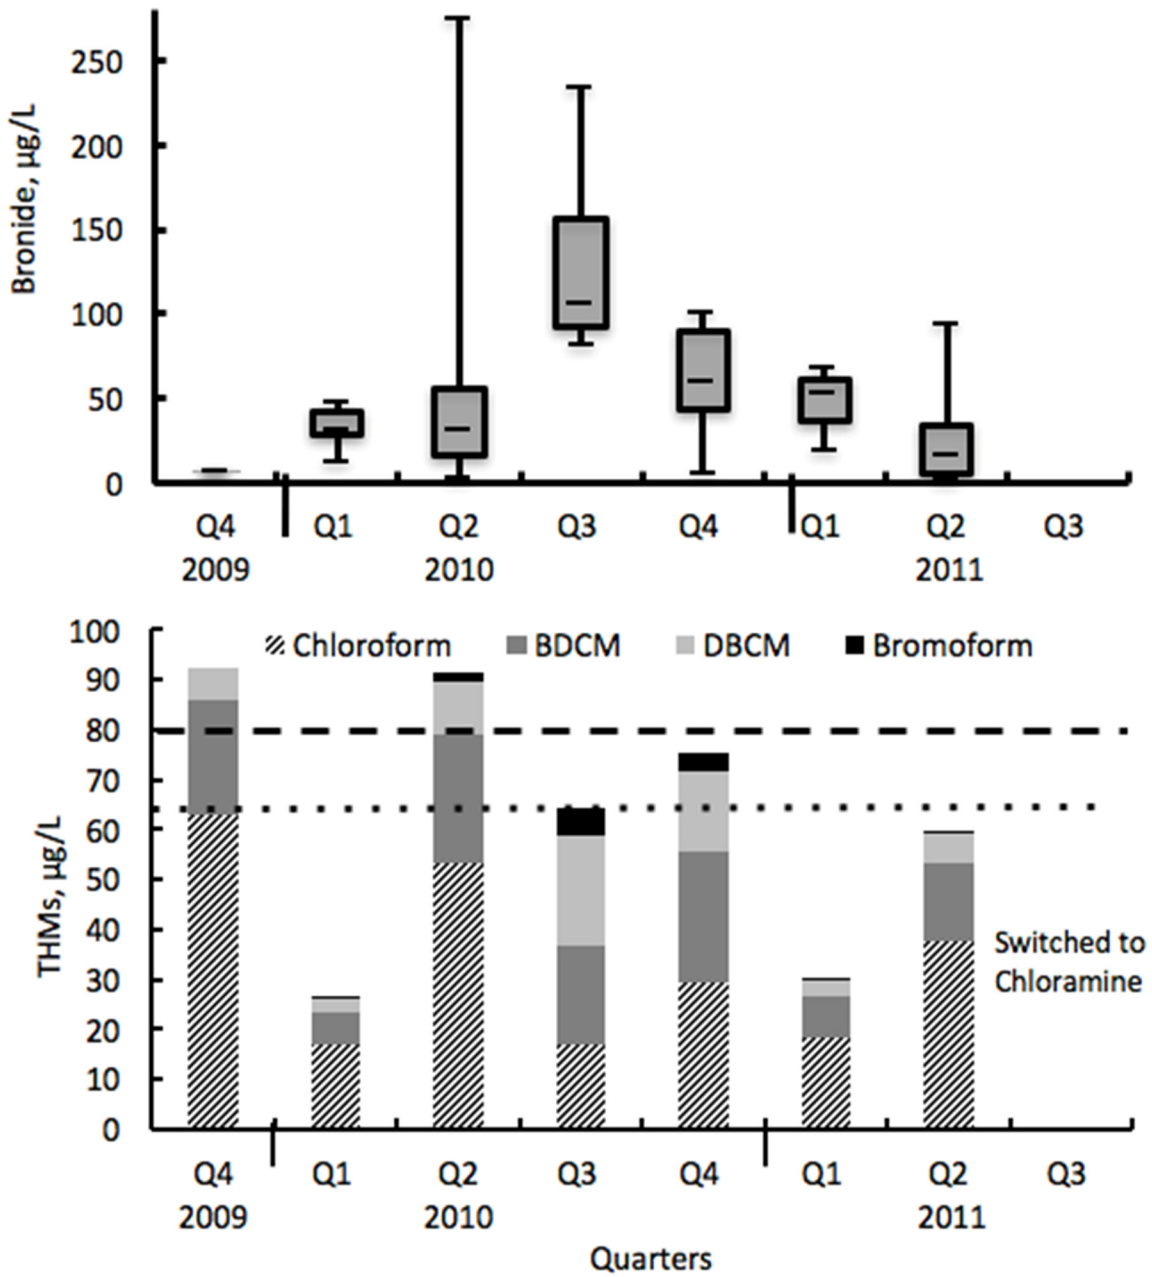

Figure S4. Quarterly bromide concentrations and individual THM species levels in finished water of Site E

SUPPLEMENTAL DATA

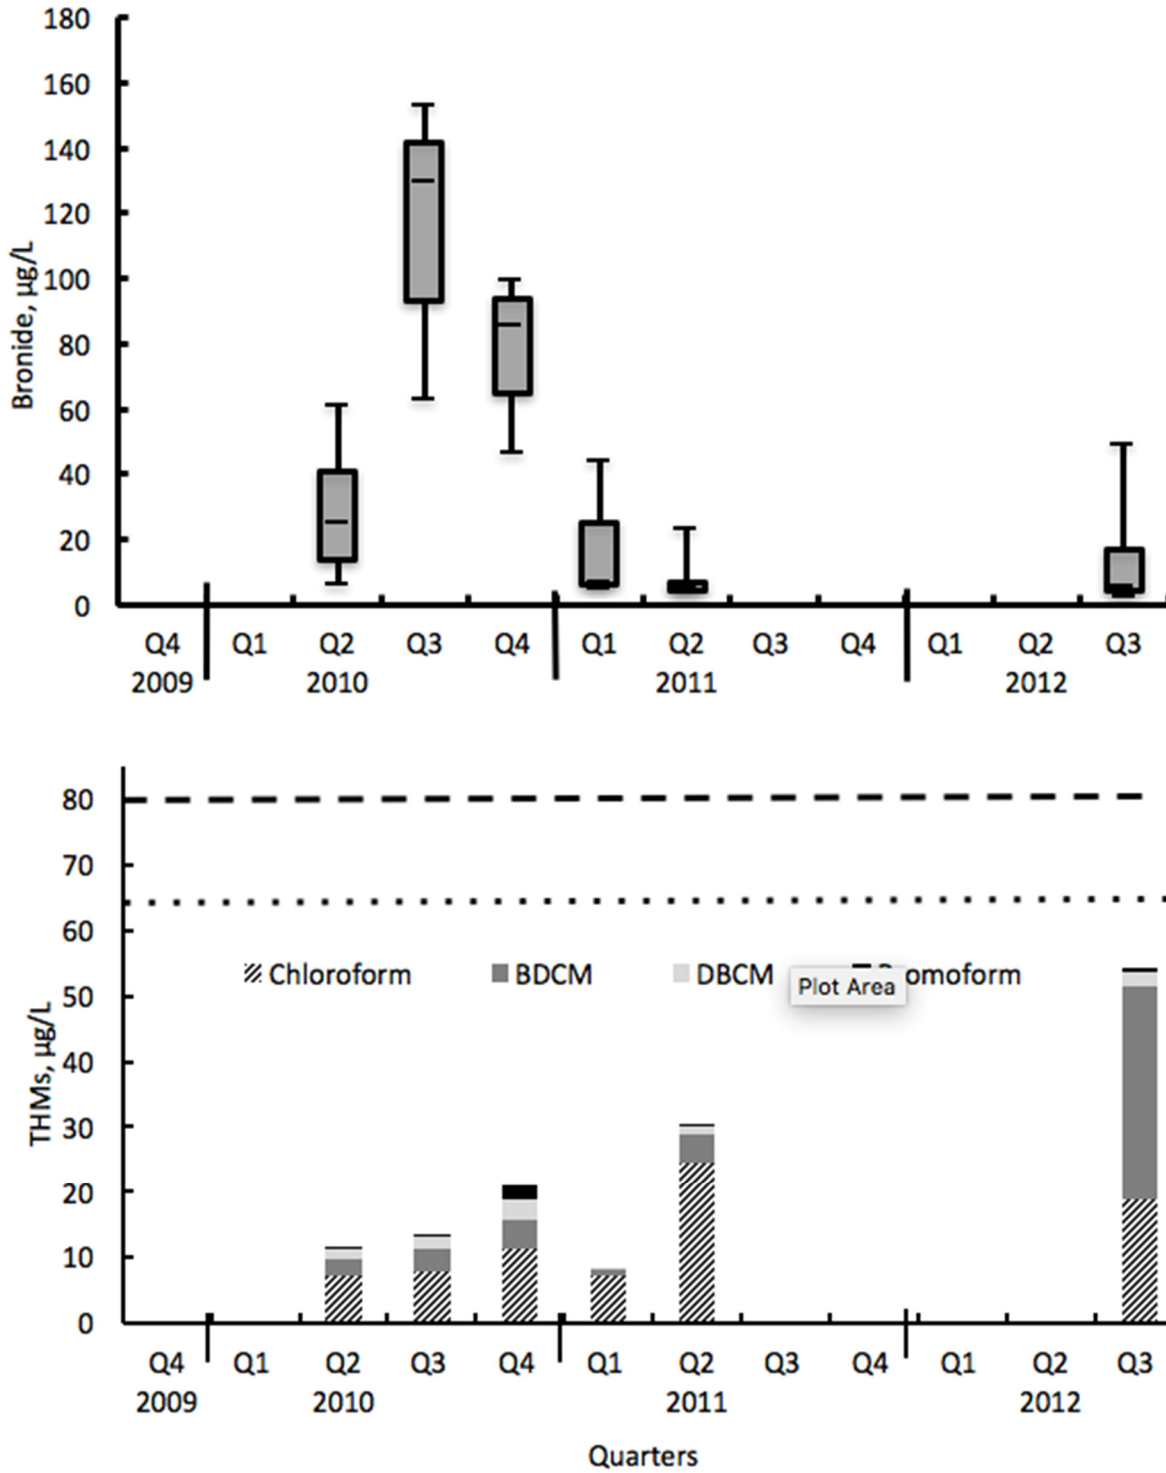

Figure S5. Quarterly bromide concentrations and individual THM species levels in finished water of Site F

SUPPLEMENTAL DATA

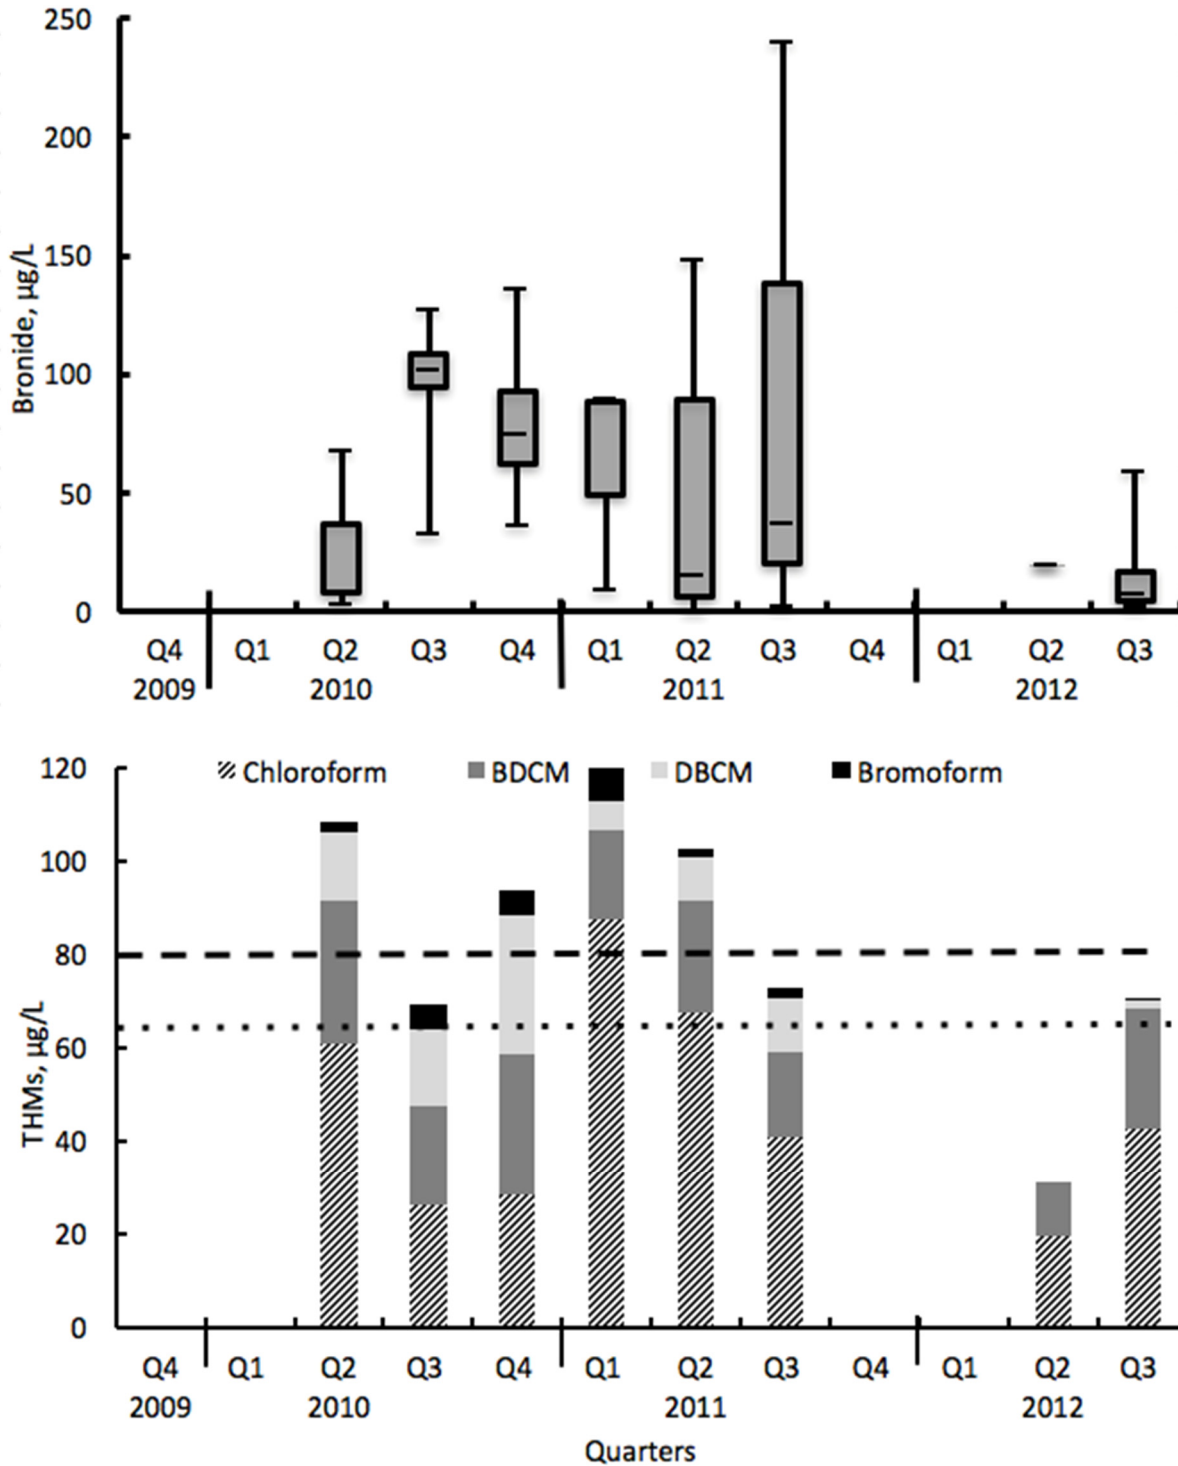

Figure S6. Quarterly HAAs concentrations in finished water at Site A

SUPPLEMENTAL DATA

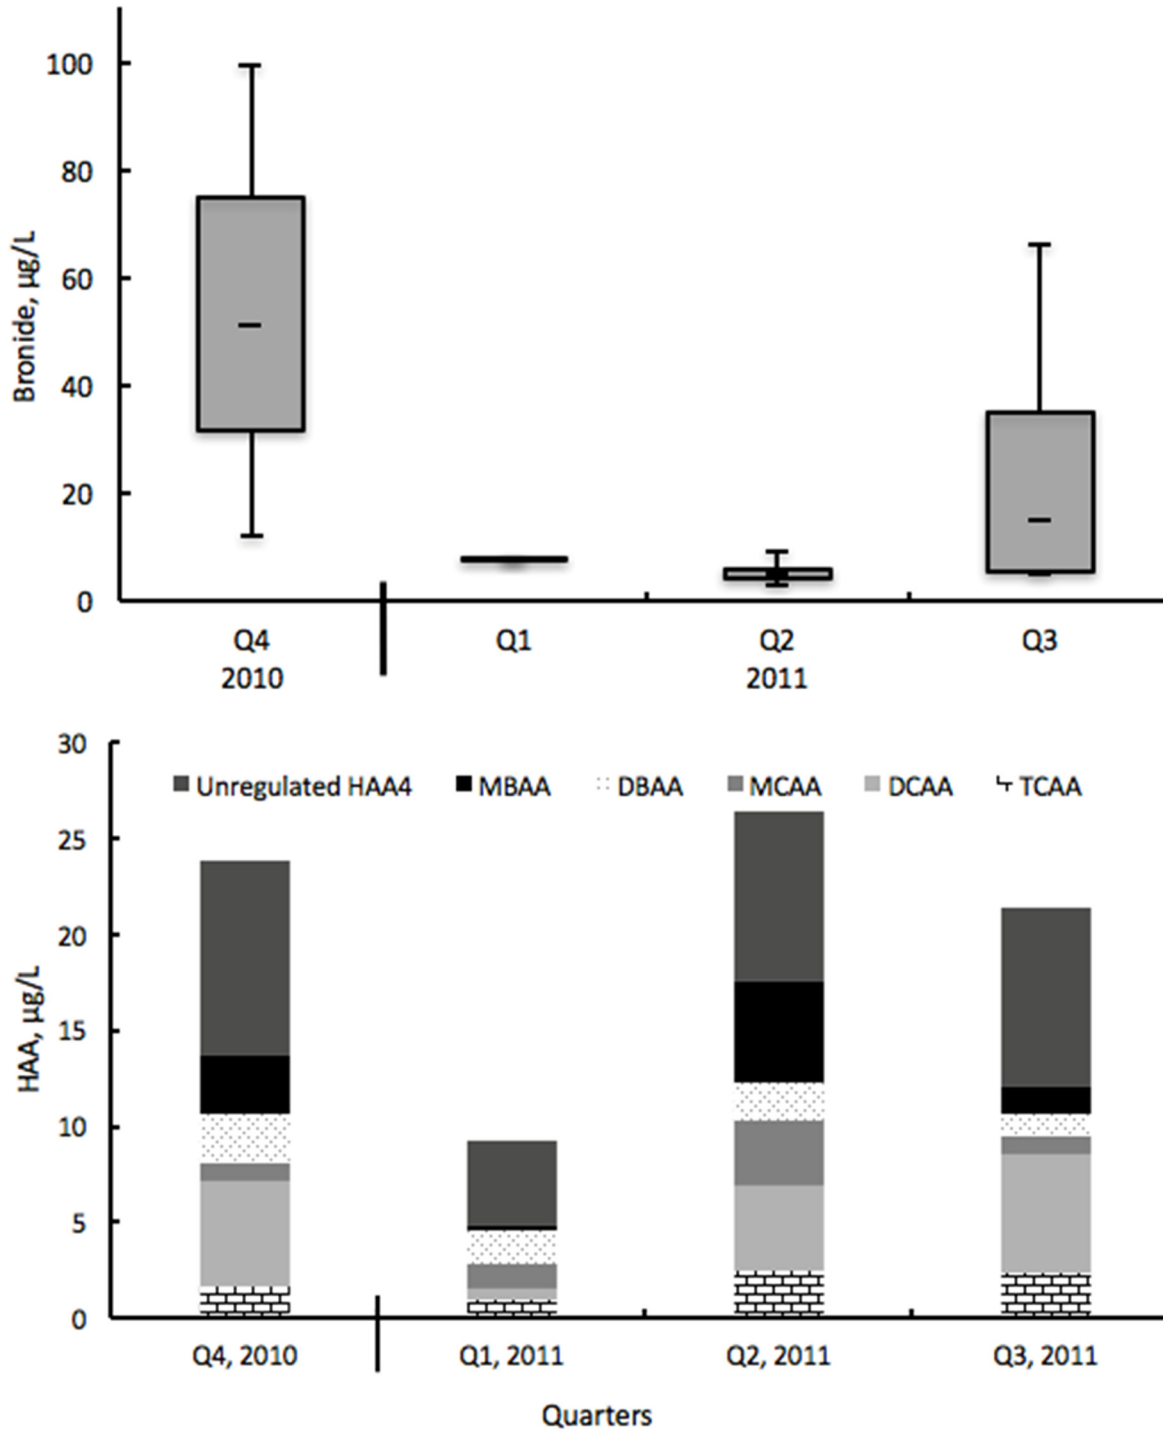

Figure S7. Quarterly HAAs concentrations in finished water at Site B



SUPPLEMENTAL DATA

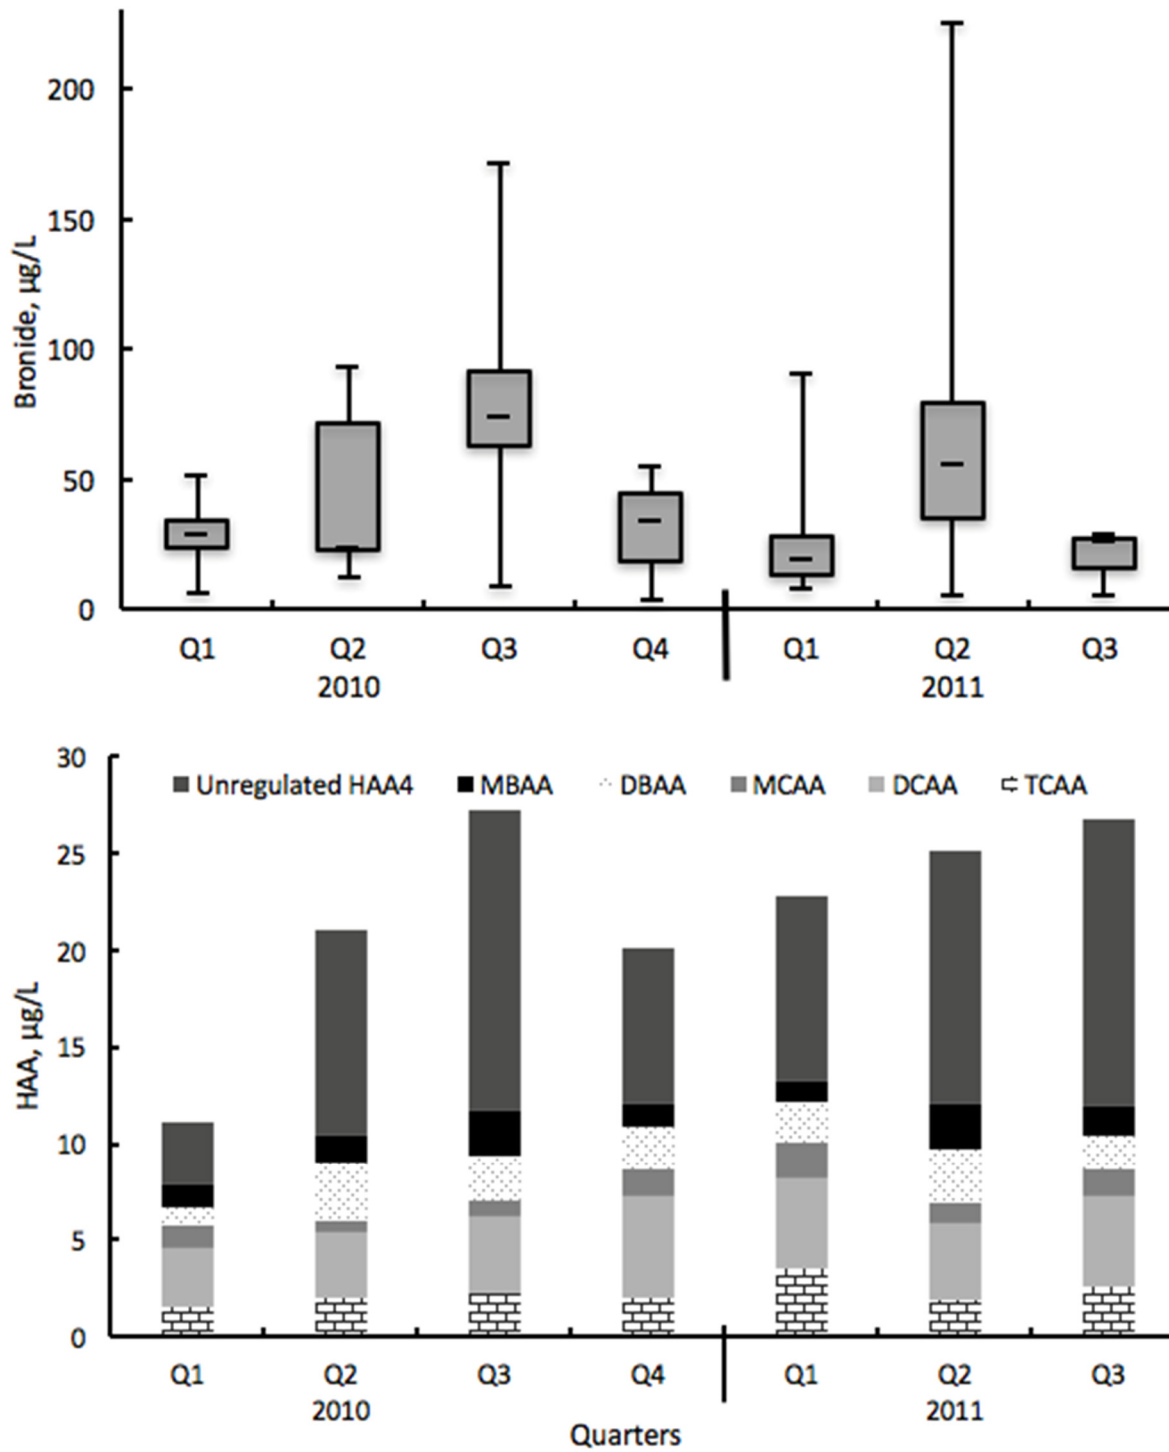

Figure S8. Quarterly HAAs concentrations in finished water at Site C

SUPPLEMENTAL DATA

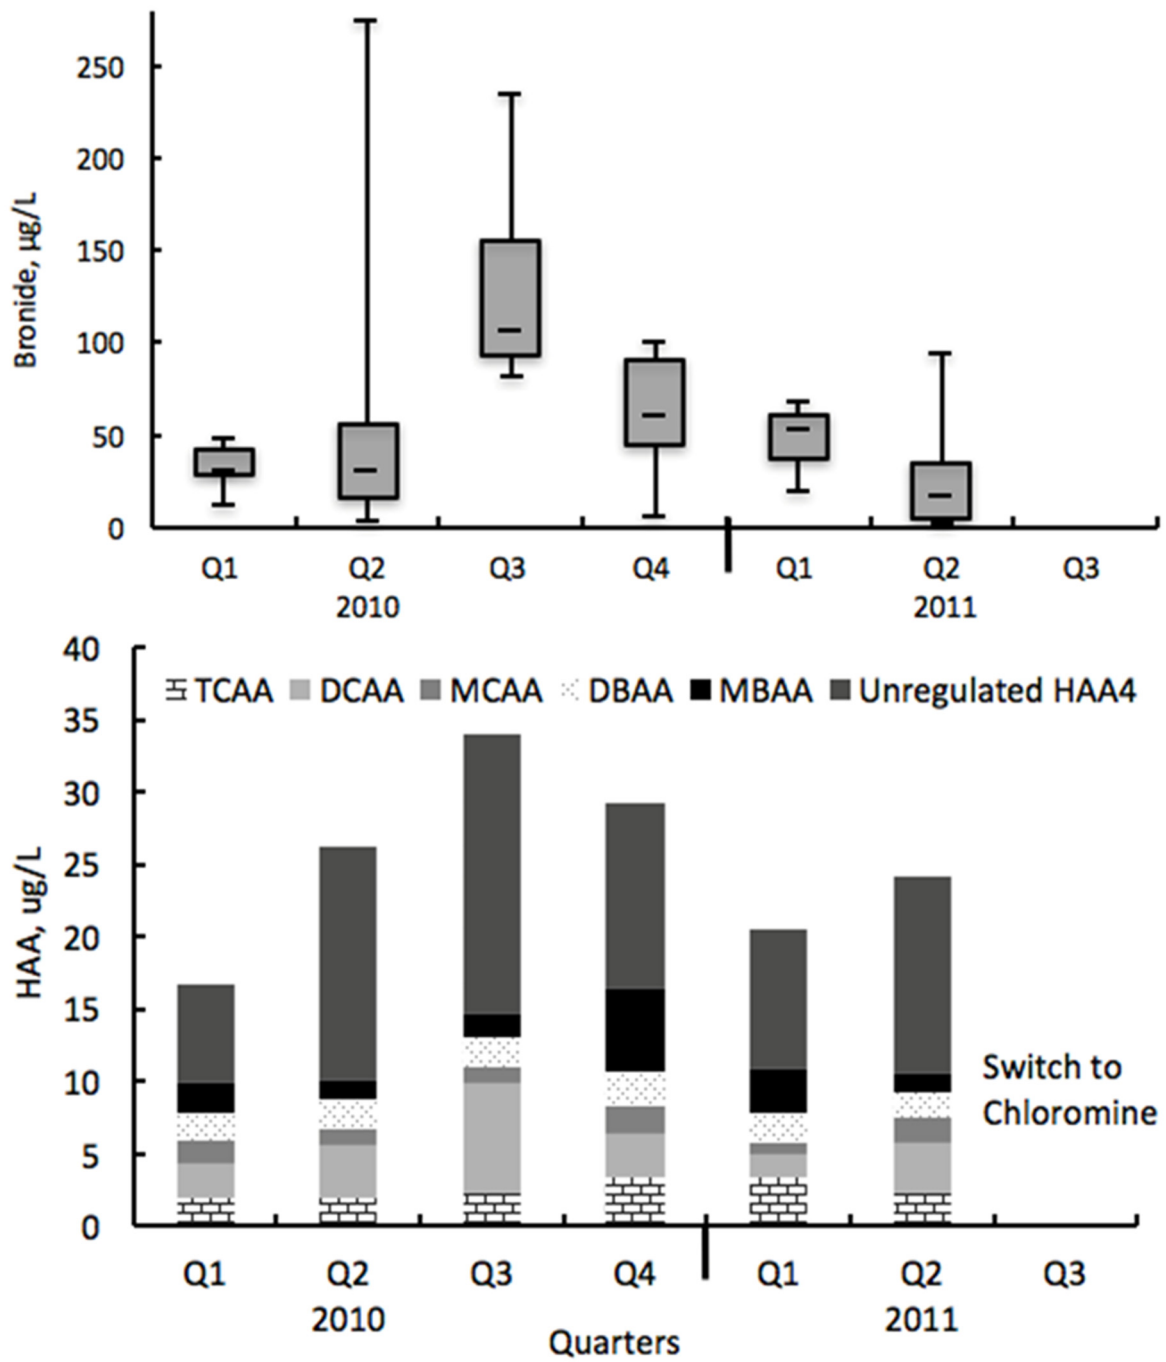

Figure S9. Quarterly HAAs concentrations in finished water at Site E

SUPPLEMENTAL DATA

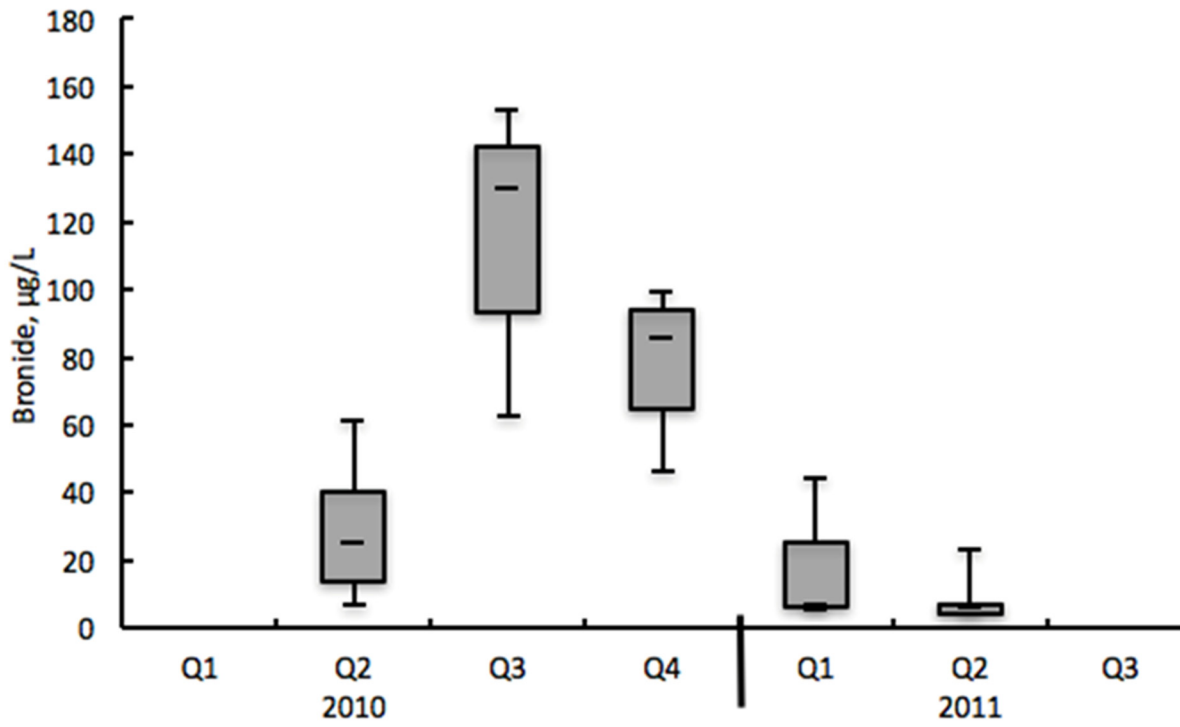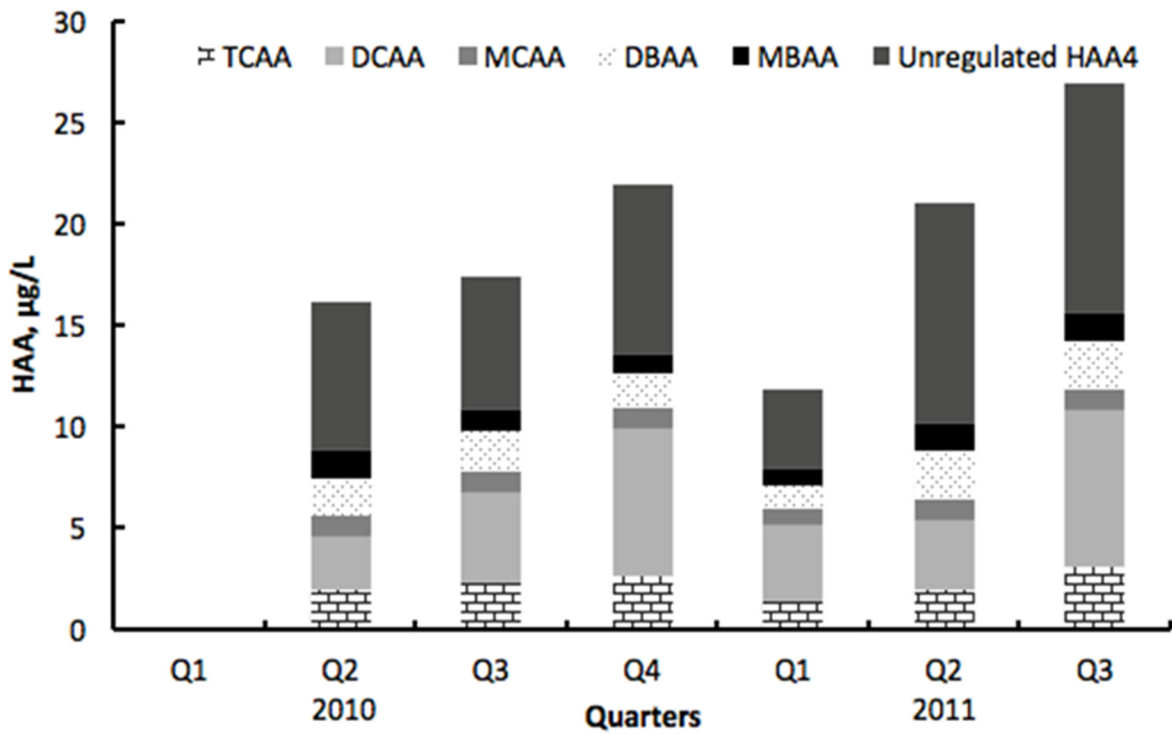

Figure S10. Quarterly HAAs concentrations in finished water at Site F

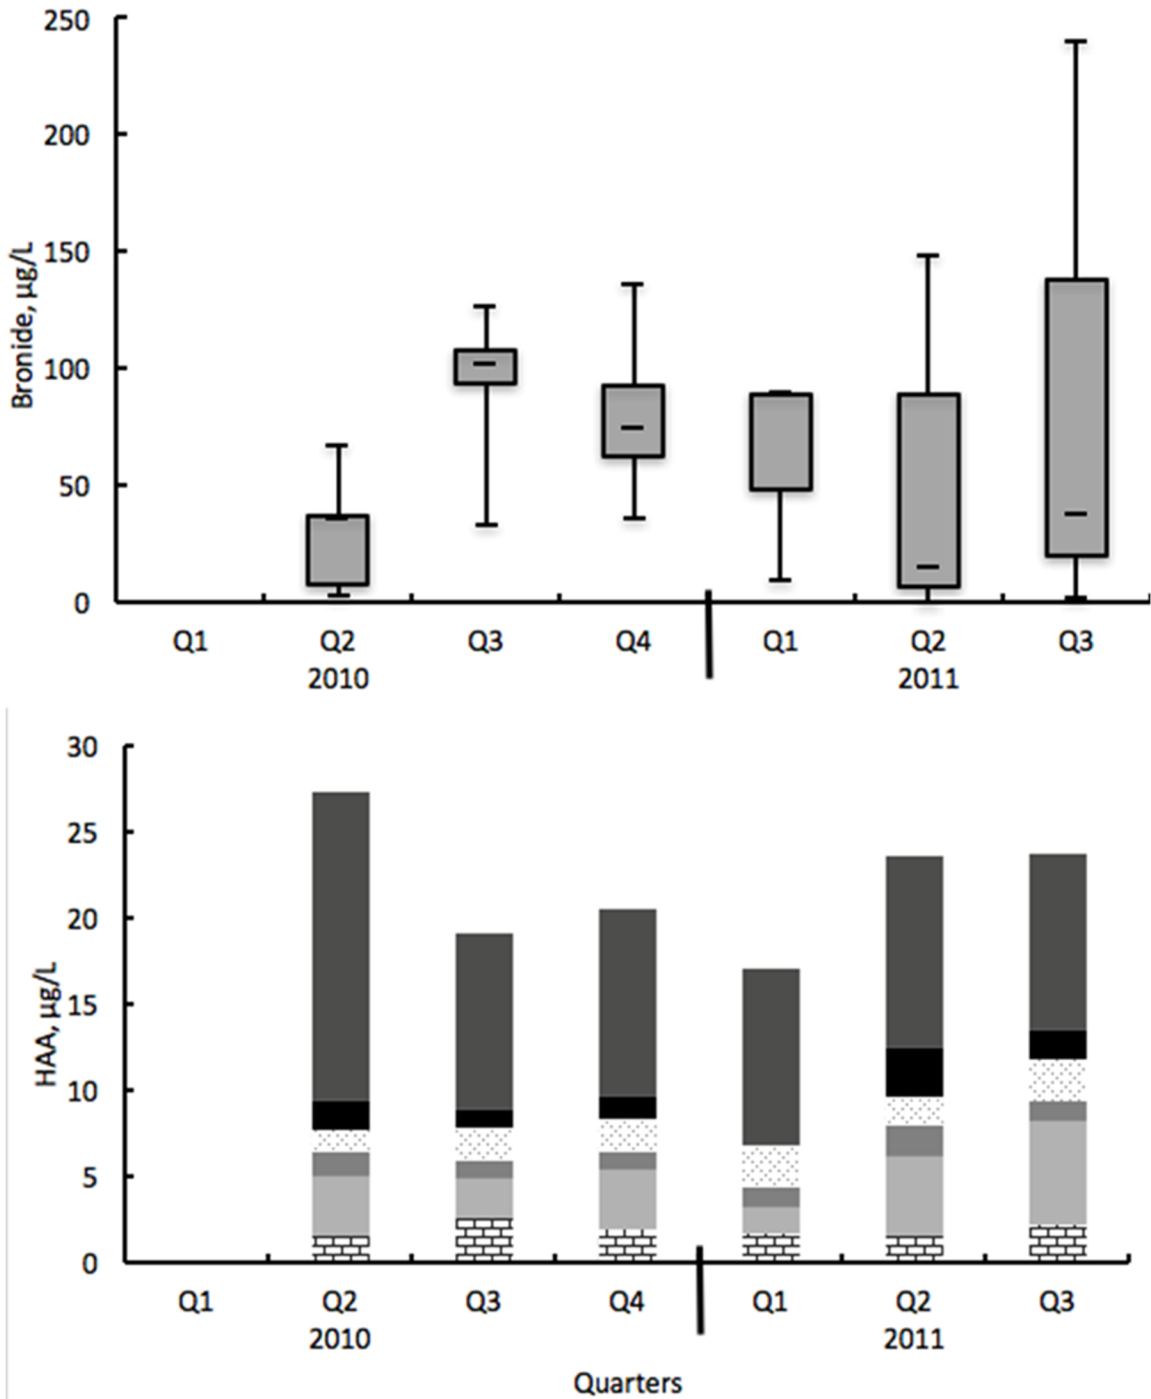

Figure S11. Regression analysis of bromination factors for HAA5 and bromide concentrations in source water

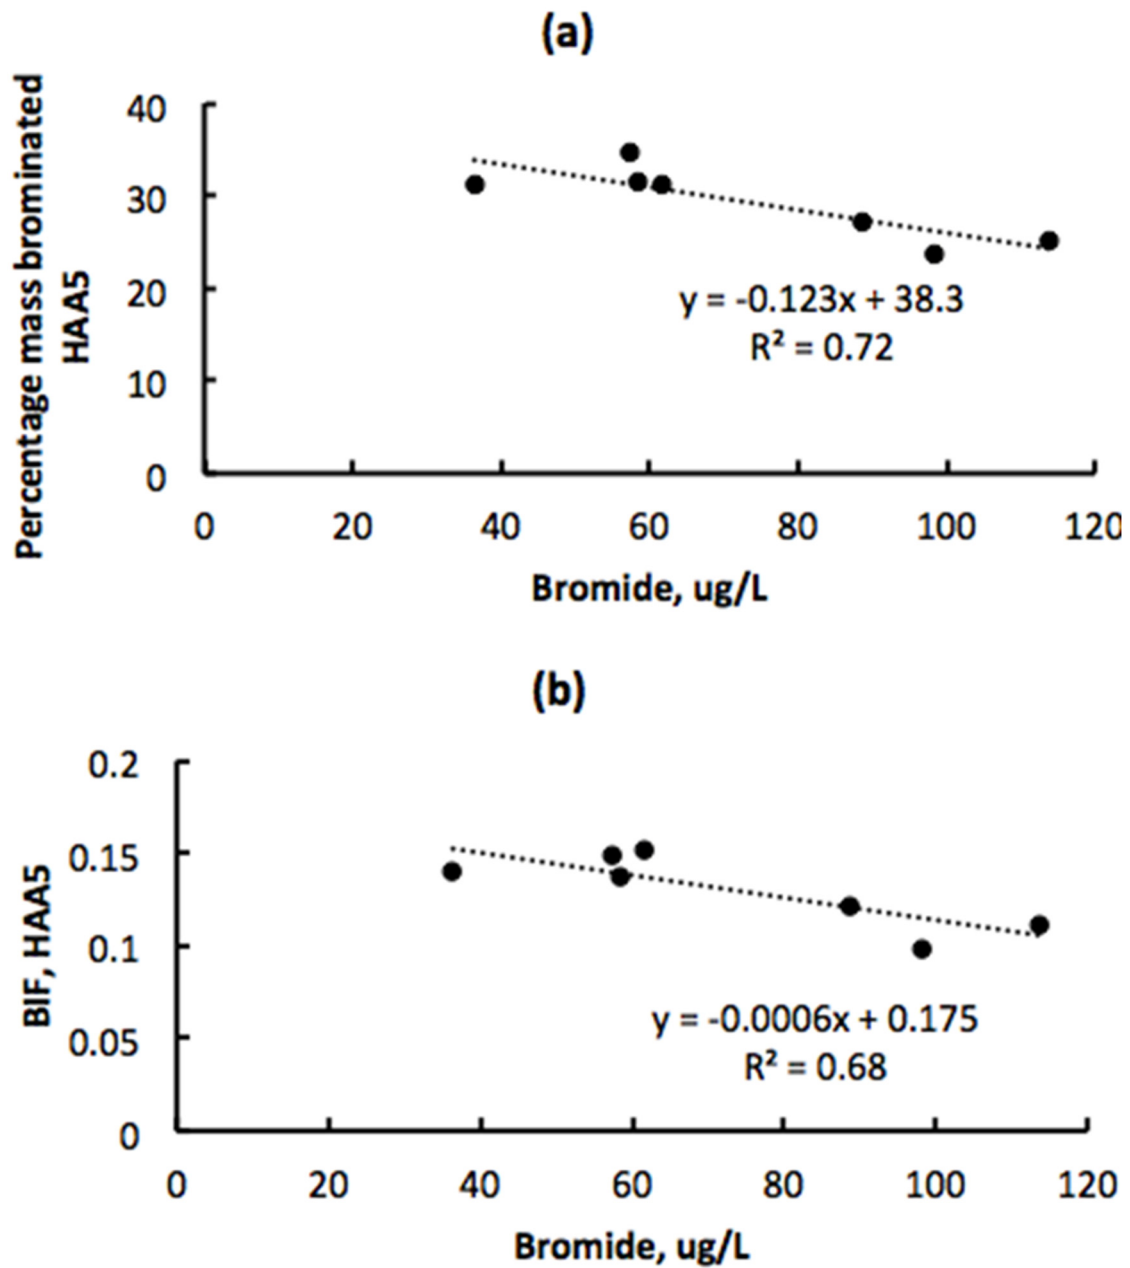

Figure S12. Oral Cancer Risk values for THM species on a quarterly basis at Site A

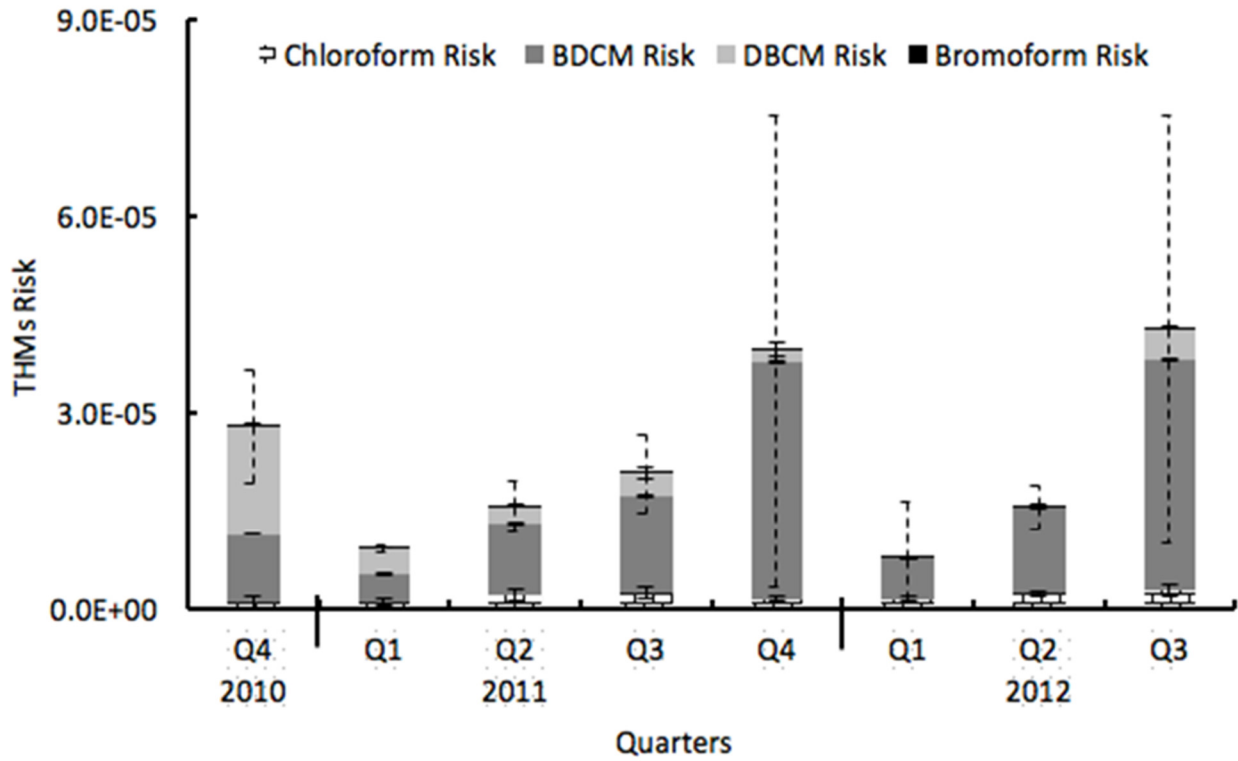

Figure S13. Oral Cancer Risk values for THM species on a quarterly basis at Site B

SUPPLEMENTAL DATA

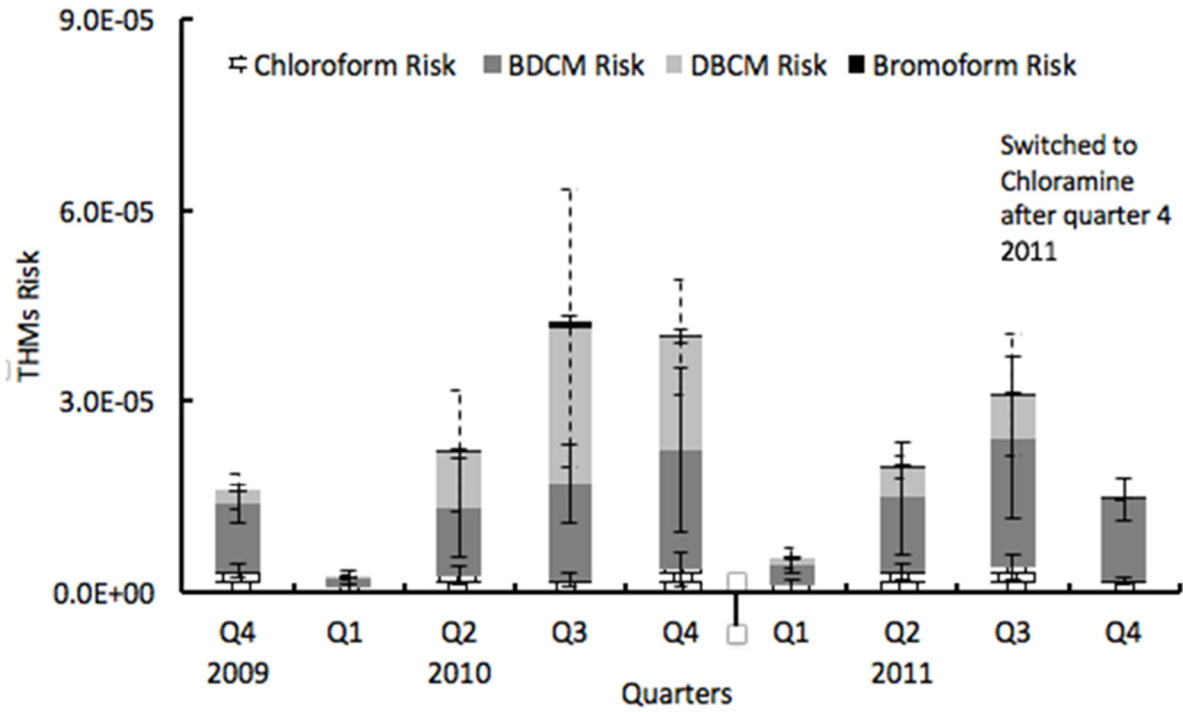

Figure S14. Oral Cancer Risk values for THM species on a quarterly basis at Site C

SUPPLEMENTAL DATA

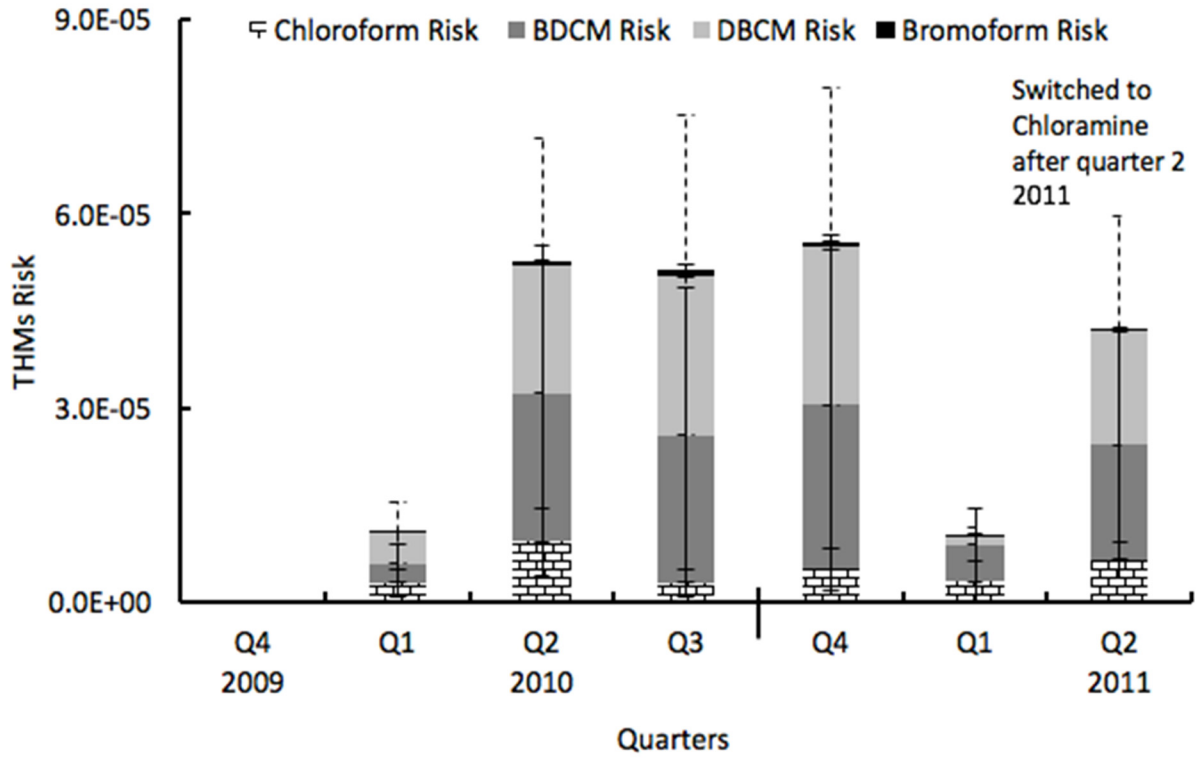

Figure S15. Oral Cancer Risk values for THM species on a quarterly basis at Site E



SUPPLEMENTAL DATA

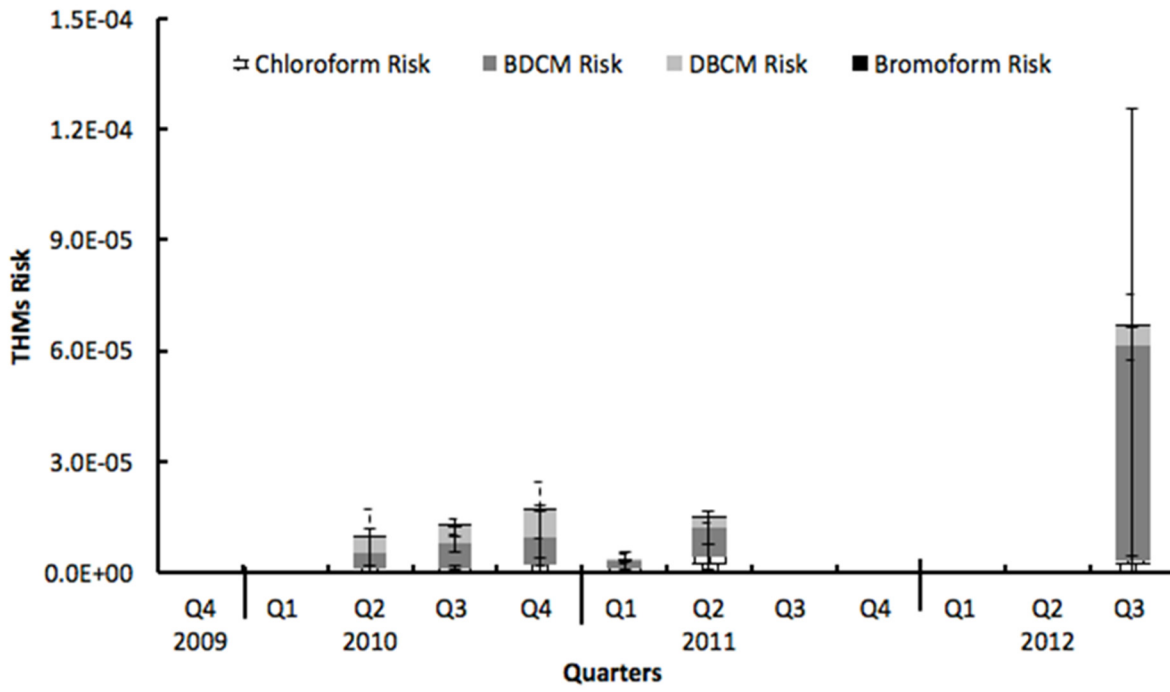

**SUPPLEMENTAL DATA**

Figure S16. Oral Cancer Risk values for THM species on a quarterly basis at Site F

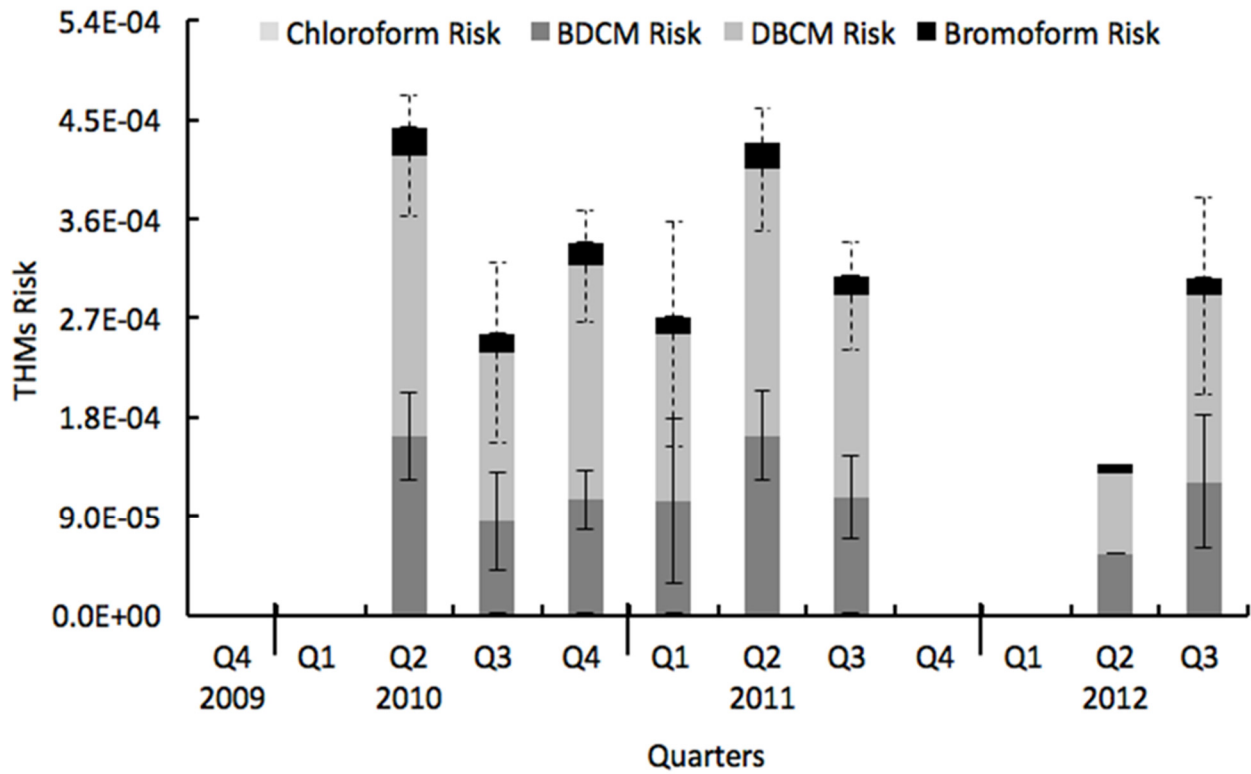

Supplement: supplemental_data_ee.1943-7870.0001175_wang.pdf [file supplemental_data_ee.1943-7870.0001175_wang.pdf]
